# Supplementary material for: First-principles studies of oxygen ion migration behavior for different valence B-site ion doped SrFeO3−δ ceramic membranes
Source: Royal Society of Chemistry journal article supplement (doi:10.1039/d1cp03845a), 2021-01-01
Supplement: d1cp03845a1.pdf [file d1cp03845a1.pdf]

Electronic Supplementary Information

**First-Principles Studies of Oxide Ion Migration Behavior for Different  
Valence B-site Ions Doped SrFeO<sub>3-δ</sub> Ceramic Membrane<sup>†</sup>**

**Sha Chen,<sup>a</sup> Hongwei Cheng,<sup>a,\*</sup> Yanbo Liu,<sup>a</sup> Xiaolu Xiong,<sup>a</sup> Qiangcao Sun,<sup>a</sup> Xionggang Lu,<sup>a,b,\*</sup> Shenggang Li,<sup>c,\*</sup>**

<sup>a</sup> *State Key Laboratory of Advanced Special Steel & Shanghai Key Laboratory of Advances Ferrometallurgy & School of Materials Science and Engineering, Shanghai University, 99 Shangda Road, Shanghai 200444, P. R. China*

<sup>b</sup> *School of Materials Science, Shanghai Dianji University, 300 Shuihua Road, Shanghai 200240, P. R. China*

<sup>c</sup> *CAS Key Laboratory of Low-Carbon Conversion Science and Engineering, Shanghai Advanced Research Institute, Chinese Academy of Sciences, 100 Haik Road, Shanghai 201210, P. R. China*

\* Corresponding authors: Tel. & fax: +86-21-66136561. E-mail addresses: [hwcheng@shu.edu.cn](mailto:hwcheng@shu.edu.cn) (H.

Cheng); [luxg@shu.edu.cn](mailto:luxg@shu.edu.cn) (X. Lu); [lisg@sari.ac.cn](mailto:lisg@sari.ac.cn) (S. Li)

## List of Supplementary Figures and Tables

**Figure S1.** DFT-calculated Fe-O and M-O (M= Al, Zr, Nb, W) bond lengths for (a)  $\text{Sr}_8\text{Fe}_8\text{O}_{24}$ , (b)  $\text{Sr}_8\text{Fe}_7\text{Al}_1\text{O}_{24}$ , (c)  $\text{Sr}_8\text{Fe}_7\text{Zr}_1\text{O}_{24}$ , (d)  $\text{Sr}_8\text{Fe}_7\text{Nb}_1\text{O}_{24}$  and (e)  $\text{Sr}_8\text{Fe}_7\text{W}_1\text{O}_{24}$ .

**Figure S2.** Charge density difference (CDD) configurations for (a)  $\text{Sr}_8\text{Fe}_8\text{O}_{24}$ , (b)  $\text{Sr}_8\text{Fe}_7\text{Al}_1\text{O}_{24}$ , (c)  $\text{Sr}_8\text{Fe}_7\text{Zr}_1\text{O}_{24}$ , (d)  $\text{Sr}_8\text{Fe}_7\text{Nb}_1\text{O}_{24}$  and (e)  $\text{Sr}_8\text{Fe}_7\text{W}_1\text{O}_{24}$ . The yellow region represents electron accumulation and the blue region represents electron depletion.

**Figure. S3** Density of states of  $\text{Sr}_8\text{Fe}_7\text{W}_1\text{O}_{24}$  and  $\text{Sr}_8\text{Fe}_6\text{W}_2\text{O}_{24}$ .

**Figure. S4** Models of (a)  $\text{Sr}_8\text{Fe}_8\text{O}_{23}$  and (b)  $\text{Sr}_{16}\text{Fe}_{16}\text{O}_{47}$ .

**Figure S5.** Schematic diagrams of (a) the oxygen migration path in  $\text{SrFe}_{0.875}\text{M}_{0.125}\text{O}_3$  through the (b) bottleneck of triangle composed by B-site ( $\text{Al}^{3+}$ ,  $\text{Zr}^{4+}$ ,  $\text{Nb}^{5+}$  and  $\text{W}^{6+}$ ) and two Fe cations.

**Figure S6.** Variations of critical radii  $r_c$  in Figure S3 (b) with different B-site ions.

**Table S1.** Oxygen ion migration energy barriers for different paths in  $\text{Sr}_8\text{Fe}_7\text{Al}_1\text{O}_{23}$ .

**Table S2.** Oxygen ion migration energy barriers for different paths in  $\text{Sr}_8\text{Fe}_7\text{Zr}_1\text{O}_{23}$ .

**Table S3.** Oxygen ion migration energy barriers for different paths in  $\text{Sr}_8\text{Fe}_7\text{Nb}_1\text{O}_{23}$ .

**Table S4.** Oxygen ion migration energy barriers for different paths in  $\text{Sr}_8\text{Fe}_7\text{W}_1\text{O}_{23}$ .

**Table S5.** The distances of M–O (Fe–O) and O–Fe in the M–O–Fe (Fe–O–Fe) chains.

**Table S6.** Fractional coordinates of the relaxed  $\text{Sr}_8\text{Fe}_8\text{O}_{24}$ .

**Table S7.** Fractional coordinates of the relaxed  $\text{Sr}_8\text{Fe}_7\text{Al}_1\text{O}_{24}$ .

**Table S8.** Fractional coordinates of the relaxed  $\text{Sr}_8\text{Fe}_7\text{Zr}_1\text{O}_{24}$ .

**Table S9.** Fractional coordinates of the relaxed  $\text{Sr}_8\text{Fe}_7\text{Nb}_1\text{O}_{24}$ .

**Table S10.** Fractional coordinates of the relaxed  $\text{Sr}_8\text{Fe}_7\text{W}_1\text{O}_{24}$ .

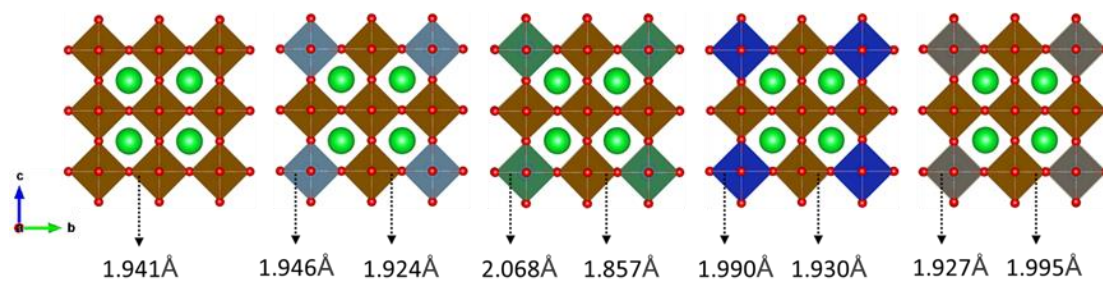

**Figure S1.** DFT-calculated Fe-O and M-O (M= Al, Zr, Nb, W) bond lengths for (a)  $\text{Sr}_8\text{Fe}_8\text{O}_{24}$ , (b)  $\text{Sr}_8\text{Fe}_7\text{Al}_1\text{O}_{24}$ , (c)  $\text{Sr}_8\text{Fe}_7\text{Zr}_1\text{O}_{24}$ , (d)  $\text{Sr}_8\text{Fe}_7\text{Nb}_1\text{O}_{24}$  and (e)  $\text{Sr}_8\text{Fe}_7\text{W}_1\text{O}_{24}$ .

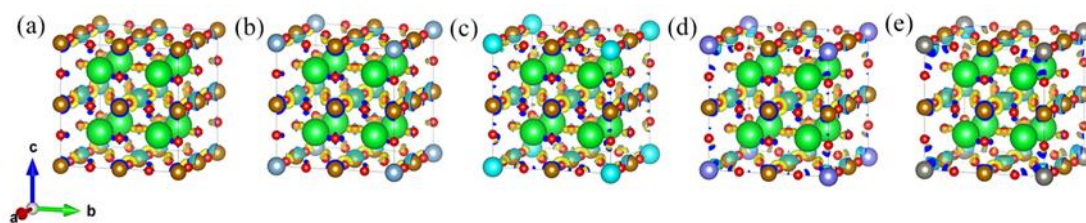

**Figure S2.** Charge density difference (CDD) configurations for (a)  $\text{Sr}_8\text{Fe}_8\text{O}_{24}$ , (b)  $\text{Sr}_8\text{Fe}_7\text{Al}_1\text{O}_{24}$ , (c)  $\text{Sr}_8\text{Fe}_7\text{Zr}_1\text{O}_{24}$ , (d)  $\text{Sr}_8\text{Fe}_7\text{Nb}_1\text{O}_{24}$  and (e)  $\text{Sr}_8\text{Fe}_7\text{W}_1\text{O}_{24}$ . The yellow region represents electron accumulation and the blue region represents electron depletion.

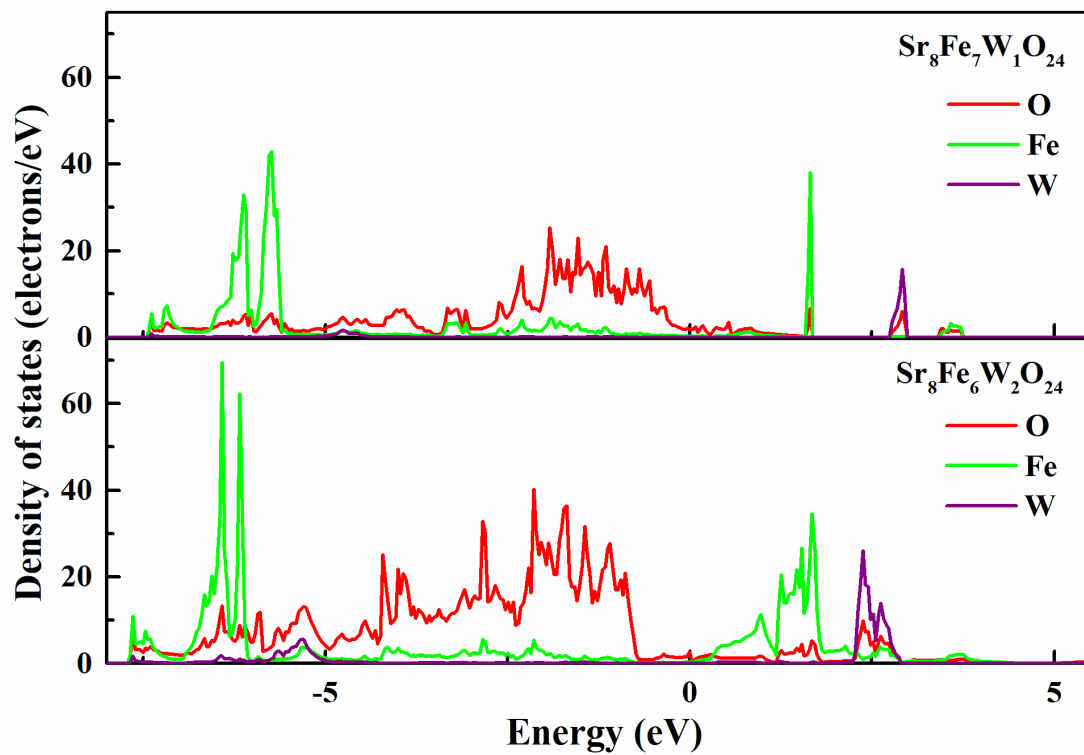

**Figure. S3** Density of states of  $\text{Sr}_8\text{Fe}_7\text{W}_1\text{O}_{24}$  and  $\text{Sr}_8\text{Fe}_6\text{W}_2\text{O}_{24}$ .

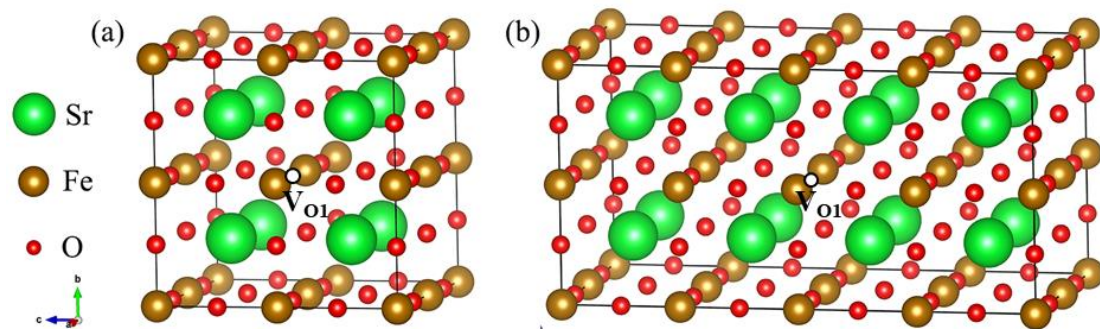

**Figure. S4** Models of (a)  $\text{Sr}_8\text{Fe}_8\text{O}_{23}$  and (b)  $\text{Sr}_{16}\text{Fe}_{16}\text{O}_{47}$ .

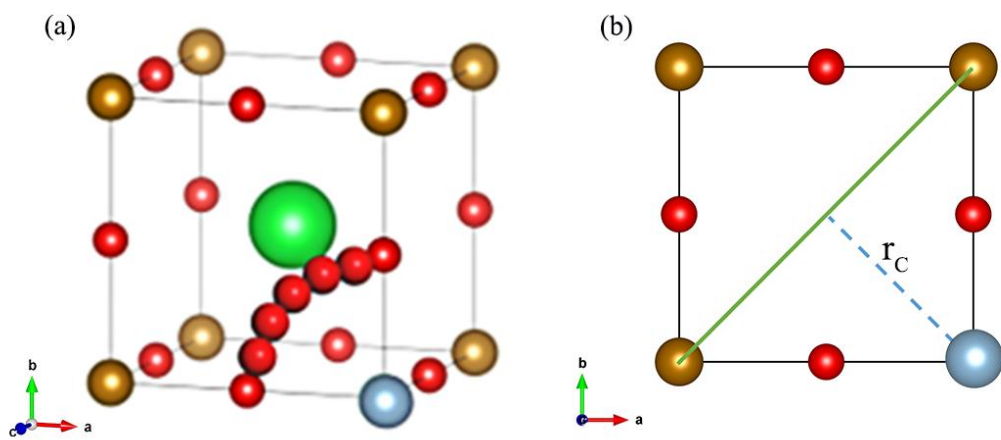

**Figure S5.** Schematic diagrams of (a) the oxygen migration path in  $\text{SrFe}_{0.875}\text{Mo}_{0.125}\text{O}_3$  through the (b) bottleneck of triangle composed by B-site ( $\text{Al}^{3+}$ ,  $\text{Zr}^{4+}$ ,  $\text{Nb}^{5+}$  and  $\text{W}^{6+}$ ) and two Fe cations.

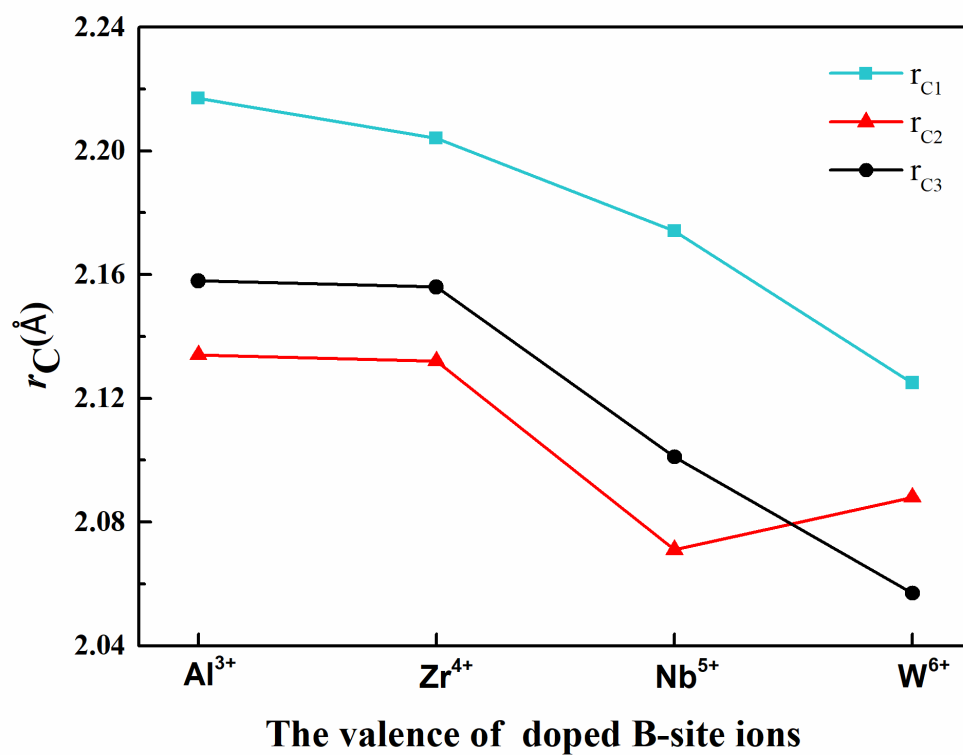

**Figure S6.** Variations of critical radii  $r_C$  in Figure S3 (b) with different B-site ions.



**Table S1.** Oxygen ion migration energy barriers for different paths in Sr<sub>8</sub>Fe<sub>7</sub>Al<sub>1</sub>O<sub>23</sub>.

|                 | Migration barrier energy[eV] |                 |                 |
|-----------------|------------------------------|-----------------|-----------------|
|                 | V <sub>O1</sub>              | V <sub>O2</sub> | V <sub>O3</sub> |
| V <sub>O1</sub> | 0.56                         | 0.87            |                 |
| V <sub>O2</sub> | 0.86                         | 0.66            | 0.59            |
| V <sub>O3</sub> |                              | 0.64            | 1.59            |

**Table S2.** Oxygen ion migration energy barriers for different paths in Sr<sub>8</sub>Fe<sub>7</sub>Zr<sub>1</sub>O<sub>23</sub>.

|                 | Migration barrier energy[eV] |                 |                 |
|-----------------|------------------------------|-----------------|-----------------|
|                 | V <sub>O1</sub>              | V <sub>O2</sub> | V <sub>O3</sub> |
| V <sub>O1</sub> | 1.67                         |                 |                 |
| V <sub>O2</sub> | 0.34                         | 0.49            |                 |
| V <sub>O3</sub> |                              | 0.70            | 0.64            |

**Table S3.** Oxygen ion migration energy barriers for different paths in  $\text{Sr}_8\text{Fe}_7\text{Nb}_1\text{O}_{23}$ .

|          | Migration barrier energy[eV] |          |          |
|----------|------------------------------|----------|----------|
|          | $V_{O1}$                     | $V_{O2}$ | $V_{O3}$ |
| $V_{O1}$ | 1.02                         |          |          |
| $V_{O2}$ | 0.21                         | 0.59     |          |
| $V_{O3}$ |                              | 0.58     | 0.38     |

**Table S4.** Oxygen ion migration energy barriers for different paths in  $\text{Sr}_8\text{Fe}_7\text{W}_1\text{O}_{23}$ .

|          | Migration barrier energy[eV] |          |          |
|----------|------------------------------|----------|----------|
|          | $V_{O1}$                     | $V_{O2}$ | $V_{O3}$ |
| $V_{O1}$ | 0.73                         |          |          |
| $V_{O2}$ | 0.27                         | 0.52     |          |
| $V_{O3}$ |                              | 0.61     | 0.24     |

**Table S5.** The distances of M–O (Fe–O) and O–Fe in the M–O–Fe (Fe–O–Fe) chains.

| Distances | Before Doping | After Doping |       |       |       |
|-----------|---------------|--------------|-------|-------|-------|
|           | Relaxed       | M=Al         | M=Zr  | M=Nb  | M=W   |
| M-O1      | -             | 1.946        | 2.068 | 1.990 | 1.927 |
| O1-Fe1    | 1.941         | 1.924        | 1.857 | 1.930 | 1.995 |
| Fe1-O2    | 1.941         | 1.947        | 1.993 | 1.999 | 1.989 |
| O2-Fe2    | 1.941         | 1.923        | 1.932 | 1.921 | 1.933 |
| Fe2-O3    | 1.941         | 1.930        | 1.975 | 1.977 | 2.011 |
| O3-Fe3    | 1.941         | 1.940        | 1.949 | 1.942 | 1.911 |

**Table S6.** Fractional coordinates of the relaxed Sr<sub>8</sub>Fe<sub>8</sub>O<sub>24</sub>.

O Fe Sr

|                    |                     |                     |
|--------------------|---------------------|---------------------|
| 1.0000000000000000 |                     |                     |
| 7.7625010644869574 | -0.0000000000000000 | 0.0000000000000000  |
| 0.0000000000000000 | 7.7625010644869574  | -0.0000000000000000 |
| 0.0000000000000000 | 0.0000000000000000  | 7.7625010644869574  |

|    |    |    |
|----|----|----|
| O  | Fe | Sr |
| 24 | 8  | 8  |

Direct

|                     |                     |                     |
|---------------------|---------------------|---------------------|
| -0.0000000000000000 | -0.0000000000000000 | 0.2500000000000000  |
| 0.2500000000000000  | -0.0000000000000000 | -0.0000000000000000 |
| 0.0000000000000000  | 0.2500000000000000  | 0.0000000000000000  |
| 0.5000000000000000  | 0.0000000000000000  | 0.2500000000000000  |
| 0.7500000000000000  | 0.0000000000000000  | -0.0000000000000000 |
| 0.5000000000000000  | 0.2500000000000000  | 0.0000000000000000  |
| -0.0000000000000000 | 0.5000000000000000  | 0.2500000000000000  |
| 0.2500000000000000  | 0.5000000000000000  | -0.0000000000000000 |
| 0.0000000000000000  | 0.7500000000000000  | -0.0000000000000000 |
| 0.5000000000000000  | 0.5000000000000000  | 0.2500000000000000  |
| 0.7500000000000000  | 0.5000000000000000  | 0.0000000000000000  |
| 0.5000000000000000  | 0.7500000000000000  | 0.0000000000000000  |
| 0.0000000000000000  | 0.0000000000000000  | 0.7500000000000000  |
| 0.2500000000000000  | -0.0000000000000000 | 0.5000000000000000  |
| -0.0000000000000000 | 0.2500000000000000  | 0.5000000000000000  |
| 0.5000000000000000  | -0.0000000000000000 | 0.7500000000000000  |
| 0.7500000000000000  | -0.0000000000000000 | 0.5000000000000000  |
| 0.5000000000000000  | 0.2500000000000000  | 0.5000000000000000  |
| -0.0000000000000000 | 0.5000000000000000  | 0.7500000000000000  |
| 0.2500000000000000  | 0.5000000000000000  | 0.5000000000000000  |
| -0.0000000000000000 | 0.7500000000000000  | 0.5000000000000000  |
| 0.5000000000000000  | 0.5000000000000000  | 0.7500000000000000  |
| 0.7500000000000000  | 0.5000000000000000  | 0.5000000000000000  |
| 0.5000000000000000  | 0.7500000000000000  | 0.5000000000000000  |
| -0.0000000000000000 | -0.0000000000000000 | 0.0000000000000000  |
| 0.5000000000000000  | 0.0000000000000000  | 0.0000000000000000  |
| 0.0000000000000000  | 0.5000000000000000  | -0.0000000000000000 |

|                    |                     |                    |
|--------------------|---------------------|--------------------|
| 0.5000000000000000 | 0.5000000000000000  | 0.0000000000000000 |
| 0.0000000000000000 | 0.0000000000000000  | 0.5000000000000000 |
| 0.5000000000000000 | -0.0000000000000000 | 0.5000000000000000 |
| 0.0000000000000000 | 0.5000000000000000  | 0.5000000000000000 |
| 0.5000000000000000 | 0.5000000000000000  | 0.5000000000000000 |
| 0.2500000000000000 | 0.2500000000000000  | 0.2500000000000000 |
| 0.7500000000000000 | 0.2500000000000000  | 0.2500000000000000 |
| 0.2500000000000000 | 0.7500000000000000  | 0.2500000000000000 |
| 0.7500000000000000 | 0.7500000000000000  | 0.2500000000000000 |
| 0.2500000000000000 | 0.2500000000000000  | 0.7500000000000000 |
| 0.7500000000000000 | 0.2500000000000000  | 0.7500000000000000 |
| 0.2500000000000000 | 0.7500000000000000  | 0.7500000000000000 |
| 0.7500000000000000 | 0.7500000000000000  | 0.7500000000000000 |

**Table S7.** Fractional coordinates of the relaxed Sr<sub>8</sub>Fe<sub>7</sub>Al<sub>1</sub>O<sub>24</sub>.

O Al Fe Sr

|                    |                    |                     |  |
|--------------------|--------------------|---------------------|--|
| 1.0000000000000000 |                    |                     |  |
| 7.7388319306714317 | 0.0000000000000000 | -0.0000000000000000 |  |
| 0.0000000000000000 | 7.7388319306714317 | -0.0000000000000000 |  |
| 0.0000000000000000 | 0.0000000000000000 | 7.7388319306714317  |  |

|    |    |    |    |
|----|----|----|----|
| O  | Al | Fe | Sr |
| 24 | 1  | 7  | 8  |

Direct

|                    |                     |                    |
|--------------------|---------------------|--------------------|
| 0.0000000000000000 | -0.0000000000000000 | 0.2513995560054657 |
| 0.2513995560054657 | -0.0000000000000000 | 0.0000000000000000 |
| 0.0000000000000000 | 0.2513995560054657  | 0.0000000000000000 |
| 0.5000000000000000 | -0.0000000000000000 | 0.2515380734888915 |
| 0.7486004439945345 | -0.0000000000000000 | 0.0000000000000000 |
| 0.5000000000000000 | 0.2515380734888915  | 0.0000000000000000 |
| 0.0000000000000000 | 0.5000000000000000  | 0.2515380734888915 |
| 0.2515380734888915 | 0.5000000000000000  | 0.0000000000000000 |
| 0.0000000000000000 | 0.7486004439945345  | 0.0000000000000000 |
| 0.5000000000000000 | 0.5000000000000000  | 0.2493686298125531 |
| 0.7484619265111085 | 0.5000000000000000  | 0.0000000000000000 |
| 0.5000000000000000 | 0.7484619265111085  | 0.0000000000000000 |
| 0.0000000000000000 | -0.0000000000000000 | 0.7486004439945345 |
| 0.2515380734888915 | -0.0000000000000000 | 0.5000000000000000 |
| 0.0000000000000000 | 0.2515380734888915  | 0.5000000000000000 |
| 0.5000000000000000 | -0.0000000000000000 | 0.7484619265111085 |
| 0.7484619265111085 | -0.0000000000000000 | 0.5000000000000000 |
| 0.5000000000000000 | 0.2493686298125531  | 0.5000000000000000 |
| 0.0000000000000000 | 0.5000000000000000  | 0.7484619265111085 |
| 0.2493686298125531 | 0.5000000000000000  | 0.5000000000000000 |
| 0.0000000000000000 | 0.7484619265111085  | 0.5000000000000000 |



|                    |                     |                    |
|--------------------|---------------------|--------------------|
| 0.5000000000000000 | 0.5000000000000000  | 0.7506313701874469 |
| 0.7506313701874469 | 0.5000000000000000  | 0.5000000000000000 |
| 0.5000000000000000 | 0.7506313701874469  | 0.5000000000000000 |
| 0.0000000000000000 | -0.0000000000000000 | 0.0000000000000000 |
| 0.5000000000000000 | -0.0000000000000000 | 0.0000000000000000 |
| 0.0000000000000000 | 0.5000000000000000  | 0.0000000000000000 |
| 0.5000000000000000 | 0.5000000000000000  | 0.0000000000000000 |
| 0.0000000000000000 | -0.0000000000000000 | 0.5000000000000000 |
| 0.5000000000000000 | -0.0000000000000000 | 0.5000000000000000 |
| 0.0000000000000000 | 0.5000000000000000  | 0.5000000000000000 |
| 0.5000000000000000 | 0.5000000000000000  | 0.5000000000000000 |
| 0.2492270125558686 | 0.2492270125558686  | 0.2492270125558686 |
| 0.7507729874441313 | 0.2492270125558686  | 0.2492270125558686 |
| 0.2492270125558686 | 0.7507729874441313  | 0.2492270125558686 |
| 0.7507729874441313 | 0.7507729874441313  | 0.2492270125558686 |
| 0.2492270125558686 | 0.2492270125558686  | 0.7507729874441313 |
| 0.7507729874441313 | 0.2492270125558686  | 0.7507729874441313 |
| 0.2492270125558686 | 0.7507729874441313  | 0.7507729874441313 |
| 0.7507729874441313 | 0.7507729874441313  | 0.7507729874441313 |

**Table S8.** Fractional coordinates of the relaxed Sr<sub>8</sub>Fe<sub>7</sub>Zr<sub>1</sub>O<sub>24</sub>.

O Zr Fe Sr

|                     |                     |                    |  |
|---------------------|---------------------|--------------------|--|
| 1.0000000000000000  |                     |                    |  |
| 7.8491345594602393  | 0.0000000000000000  | 0.0000000000000000 |  |
| -0.0000000000000000 | 7.8491345594602393  | 0.0000000000000000 |  |
| 0.0000000000000000  | -0.0000000000000000 | 7.8491345594602393 |  |

|    |    |    |    |
|----|----|----|----|
| O  | Zr | Fe | Sr |
| 24 | 1  | 7  | 8  |

Direct

|                     |                     |                    |  |
|---------------------|---------------------|--------------------|--|
| -0.0000000000000000 | -0.0000000000000000 | 0.2634298396077951 |  |
| 0.2634298396077951  | -0.0000000000000000 | 0.0000000000000000 |  |
| -0.0000000000000000 | 0.2634298396077951  | 0.0000000000000000 |  |
| 0.5000000000000000  | -0.0000000000000000 | 0.2538558604298679 |  |
| 0.7365701603922046  | -0.0000000000000000 | 0.0000000000000000 |  |
| 0.5000000000000000  | 0.2538558604298679  | 0.0000000000000000 |  |
| -0.0000000000000000 | 0.5000000000000000  | 0.2538558604298679 |  |
| 0.2538558604298679  | 0.5000000000000000  | 0.0000000000000000 |  |
| -0.0000000000000000 | 0.7365701603922046  | 0.0000000000000000 |  |
| 0.5000000000000000  | 0.5000000000000000  | 0.2516575356663439 |  |
| 0.7461441395701319  | 0.5000000000000000  | 0.0000000000000000 |  |
| 0.5000000000000000  | 0.7461441395701319  | 0.0000000000000000 |  |
| -0.0000000000000000 | -0.0000000000000000 | 0.7365701603922046 |  |
| 0.2538558604298679  | -0.0000000000000000 | 0.5000000000000000 |  |
| -0.0000000000000000 | 0.2538558604298679  | 0.5000000000000000 |  |
| 0.5000000000000000  | -0.0000000000000000 | 0.7461441395701319 |  |
| 0.7461441395701319  | -0.0000000000000000 | 0.5000000000000000 |  |
| 0.5000000000000000  | 0.2516575356663439  | 0.5000000000000000 |  |
| -0.0000000000000000 | 0.5000000000000000  | 0.7461441395701319 |  |
| 0.2516575356663439  | 0.5000000000000000  | 0.5000000000000000 |  |
| -0.0000000000000000 | 0.7461441395701319  | 0.5000000000000000 |  |
| 0.5000000000000000  | 0.5000000000000000  | 0.7483424643336563 |  |
| 0.7483424643336563  | 0.5000000000000000  | 0.5000000000000000 |  |
| 0.5000000000000000  | 0.7483424643336563  | 0.5000000000000000 |  |
| -0.0000000000000000 | -0.0000000000000000 | 0.0000000000000000 |  |
| 0.5000000000000000  | -0.0000000000000000 | 0.0000000000000000 |  |
| -0.0000000000000000 | 0.5000000000000000  | 0.0000000000000000 |  |

|                     |                     |                    |
|---------------------|---------------------|--------------------|
| 0.5000000000000000  | 0.5000000000000000  | 0.0000000000000000 |
| -0.0000000000000000 | -0.0000000000000000 | 0.5000000000000000 |
| 0.5000000000000000  | -0.0000000000000000 | 0.5000000000000000 |
| -0.0000000000000000 | 0.5000000000000000  | 0.5000000000000000 |
| 0.5000000000000000  | 0.5000000000000000  | 0.5000000000000000 |
| 0.2566149719060321  | 0.2566149719060321  | 0.2566149719060321 |
| 0.7433850280939681  | 0.2566149719060321  | 0.2566149719060321 |
| 0.2566149719060321  | 0.7433850280939681  | 0.2566149719060321 |
| 0.7433850280939681  | 0.7433850280939681  | 0.2566149719060321 |
| 0.2566149719060321  | 0.2566149719060321  | 0.7433850280939681 |
| 0.7433850280939681  | 0.2566149719060321  | 0.7433850280939681 |
| 0.2566149719060321  | 0.7433850280939681  | 0.7433850280939681 |
| 0.7433850280939681  | 0.7433850280939681  | 0.7433850280939681 |

**Table S9.** Fractional coordinates of the relaxed Sr<sub>8</sub>Fe<sub>7</sub>Nb<sub>1</sub>O<sub>24</sub>.

O Nb Fe Sr

|                    |                    |                     |  |
|--------------------|--------------------|---------------------|--|
| 1.0000000000000000 |                    |                     |  |
| 7.8395231636874918 | 0.0000000000000000 | -0.0000000000000000 |  |
| 0.0000000000000000 | 7.8395231636874918 | -0.0000000000000000 |  |
| 0.0000000000000000 | 0.0000000000000000 | 7.8395231636874918  |  |

|    |    |    |    |
|----|----|----|----|
| O  | Nb | Fe | Sr |
| 24 | 1  | 7  | 8  |

Direct

|                     |                     |                     |  |
|---------------------|---------------------|---------------------|--|
| -0.0000000000000000 | -0.0000000000000000 | 0.2537930453324826  |  |
| 0.2537930453324826  | -0.0000000000000000 | -0.0000000000000000 |  |
| -0.0000000000000000 | 0.2537930453324826  | -0.0000000000000000 |  |
| 0.5000000000000000  | -0.0000000000000000 | 0.2549284135125895  |  |
| 0.7462069546675173  | -0.0000000000000000 | -0.0000000000000000 |  |
| 0.5000000000000000  | 0.2549284135125895  | -0.0000000000000000 |  |
| -0.0000000000000000 | 0.5000000000000000  | 0.2549284135125895  |  |
| 0.2549284135125895  | 0.5000000000000000  | -0.0000000000000000 |  |
| -0.0000000000000000 | 0.7462069546675173  | -0.0000000000000000 |  |
| 0.5000000000000000  | 0.5000000000000000  | 0.2522424467565099  |  |
| 0.7450715864874107  | 0.5000000000000000  | -0.0000000000000000 |  |
| 0.5000000000000000  | 0.7450715864874107  | -0.0000000000000000 |  |
| -0.0000000000000000 | -0.0000000000000000 | 0.7462069546675173  |  |
| 0.2549284135125895  | -0.0000000000000000 | 0.5000000000000000  |  |
| -0.0000000000000000 | 0.2549284135125895  | 0.5000000000000000  |  |
| 0.5000000000000000  | -0.0000000000000000 | 0.7450715864874107  |  |
| 0.7450715864874107  | -0.0000000000000000 | 0.5000000000000000  |  |
| 0.5000000000000000  | 0.2522424467565099  | 0.5000000000000000  |  |
| -0.0000000000000000 | 0.5000000000000000  | 0.7450715864874107  |  |
| 0.2522424467565099  | 0.5000000000000000  | 0.5000000000000000  |  |
| -0.0000000000000000 | 0.7450715864874107  | 0.5000000000000000  |  |
| 0.5000000000000000  | 0.5000000000000000  | 0.7477575532434901  |  |
| 0.7477575532434901  | 0.5000000000000000  | 0.5000000000000000  |  |
| 0.5000000000000000  | 0.7477575532434901  | 0.5000000000000000  |  |
| -0.0000000000000000 | -0.0000000000000000 | -0.0000000000000000 |  |
| 0.5000000000000000  | -0.0000000000000000 | -0.0000000000000000 |  |
| -0.0000000000000000 | 0.5000000000000000  | -0.0000000000000000 |  |

|                     |                     |                     |
|---------------------|---------------------|---------------------|
| 0.5000000000000000  | 0.5000000000000000  | -0.0000000000000000 |
| -0.0000000000000000 | -0.0000000000000000 | 0.5000000000000000  |
| 0.5000000000000000  | -0.0000000000000000 | 0.5000000000000000  |
| -0.0000000000000000 | 0.5000000000000000  | 0.5000000000000000  |
| 0.5000000000000000  | 0.5000000000000000  | 0.5000000000000000  |
| 0.2562037181380474  | 0.2562037181380474  | 0.2562037181380474  |
| 0.7437962818619525  | 0.2562037181380474  | 0.2562037181380474  |
| 0.2562037181380474  | 0.7437962818619525  | 0.2562037181380474  |
| 0.7437962818619525  | 0.7437962818619525  | 0.2562037181380474  |
| 0.2562037181380474  | 0.2562037181380474  | 0.7437962818619525  |
| 0.7437962818619525  | 0.2562037181380474  | 0.7437962818619525  |
| 0.2562037181380474  | 0.7437962818619525  | 0.7437962818619525  |
| 0.7437962818619525  | 0.7437962818619525  | 0.7437962818619525  |

**Table S10.** Fractional coordinates of the relaxed Sr<sub>8</sub>Fe<sub>7</sub>W<sub>1</sub>O<sub>24</sub>.

O W Fe Sr

|                    |                    |                     |  |
|--------------------|--------------------|---------------------|--|
| 1.0000000000000000 |                    |                     |  |
| 7.8438174341545617 | 0.0000000000000000 | -0.0000000000000000 |  |
| 0.0000000000000000 | 7.8438174341545617 | -0.0000000000000000 |  |
| 0.0000000000000000 | 0.0000000000000000 | 7.8438174341545617  |  |

|    |   |    |    |
|----|---|----|----|
| O  | W | Fe | Sr |
| 24 | 1 | 7  | 8  |

Direct

|                     |                    |                    |  |
|---------------------|--------------------|--------------------|--|
| -0.0000000000000000 | 0.0000000000000000 | 0.2457004434036427 |  |
| 0.2457004434036427  | 0.0000000000000000 | 0.0000000000000000 |  |
| -0.0000000000000000 | 0.2457004434036427 | 0.0000000000000000 |  |
| 0.5000000000000000  | 0.0000000000000000 | 0.2535573355128342 |  |
| 0.7542995565963573  | 0.0000000000000000 | 0.0000000000000000 |  |
| 0.5000000000000000  | 0.2535573355128342 | 0.0000000000000000 |  |
| -0.0000000000000000 | 0.5000000000000000 | 0.2535573355128342 |  |
| 0.2535573355128342  | 0.5000000000000000 | 0.0000000000000000 |  |
| -0.0000000000000000 | 0.7542995565963573 | 0.0000000000000000 |  |
| 0.5000000000000000  | 0.5000000000000000 | 0.2563959370863749 |  |
| 0.7464426644871659  | 0.5000000000000000 | 0.0000000000000000 |  |
| 0.5000000000000000  | 0.7464426644871659 | 0.0000000000000000 |  |
| -0.0000000000000000 | 0.0000000000000000 | 0.7542995565963573 |  |
| 0.2535573355128342  | 0.0000000000000000 | 0.5000000000000000 |  |
| -0.0000000000000000 | 0.2535573355128342 | 0.5000000000000000 |  |
| 0.5000000000000000  | 0.0000000000000000 | 0.7464426644871659 |  |
| 0.7464426644871659  | 0.0000000000000000 | 0.5000000000000000 |  |
| 0.5000000000000000  | 0.2563959370863749 | 0.5000000000000000 |  |
| -0.0000000000000000 | 0.5000000000000000 | 0.7464426644871659 |  |
| 0.2563959370863749  | 0.5000000000000000 | 0.5000000000000000 |  |
| -0.0000000000000000 | 0.7464426644871659 | 0.5000000000000000 |  |
| 0.5000000000000000  | 0.5000000000000000 | 0.7436040629136250 |  |
| 0.7436040629136250  | 0.5000000000000000 | 0.5000000000000000 |  |
| 0.5000000000000000  | 0.7436040629136250 | 0.5000000000000000 |  |
| -0.0000000000000000 | 0.0000000000000000 | 0.0000000000000000 |  |
| 0.5000000000000000  | 0.0000000000000000 | 0.0000000000000000 |  |
| -0.0000000000000000 | 0.5000000000000000 | 0.0000000000000000 |  |

|                     |                    |                    |
|---------------------|--------------------|--------------------|
| 0.5000000000000000  | 0.5000000000000000 | 0.0000000000000000 |
| -0.0000000000000000 | 0.0000000000000000 | 0.5000000000000000 |
| 0.5000000000000000  | 0.0000000000000000 | 0.5000000000000000 |
| -0.0000000000000000 | 0.5000000000000000 | 0.5000000000000000 |
| 0.5000000000000000  | 0.5000000000000000 | 0.5000000000000000 |
| 0.2583571702964959  | 0.2583571702964959 | 0.2583571702964959 |
| 0.7416428297035039  | 0.2583571702964959 | 0.2583571702964959 |
| 0.2583571702964959  | 0.7416428297035039 | 0.2583571702964959 |
| 0.7416428297035039  | 0.7416428297035039 | 0.2583571702964959 |
| 0.2583571702964959  | 0.2583571702964959 | 0.7416428297035039 |
| 0.7416428297035039  | 0.2583571702964959 | 0.7416428297035039 |
| 0.2583571702964959  | 0.7416428297035039 | 0.7416428297035039 |
| 0.7416428297035039  | 0.7416428297035039 | 0.7416428297035039 |
